# Supplementary material for: Encapsulation of a Ru(II) Polypyridyl Complex into Polylactide Nanoparticles for Antimicrobial Photodynamic Therapy
Source: MDPI journal article supplement (doi:10.3390/pharmaceutics12100961), 2020-10-13
Supplement: s1 [file s1]

# Supplementary Materials: Encapsulation of a Ru(II) Polypyridyl Complex into Polylactide Nanoparticles for Antimicrobial Photodynamic Therapy

Nancy Soliman, Vincent Sol, Tan-Sothea Ouk, Christophe M. Thomas and Gilles Gasser

|                                | Size (d.nm):         | % Intensity: | St Dev (d.nm): |
|--------------------------------|----------------------|--------------|----------------|
| <b>Z-Average (d.nm):</b> 155,0 | <b>Peak 1:</b> 178,5 | 100,0        | 67,10          |
| <b>Pdl:</b> 0,125              | <b>Peak 2:</b> 0,000 | 0,0          | 0,000          |
| <b>Intercept:</b> 0,920        | <b>Peak 3:</b> 0,000 | 0,0          | 0,000          |
| <b>Result quality :</b> Good   |                      |              |                |

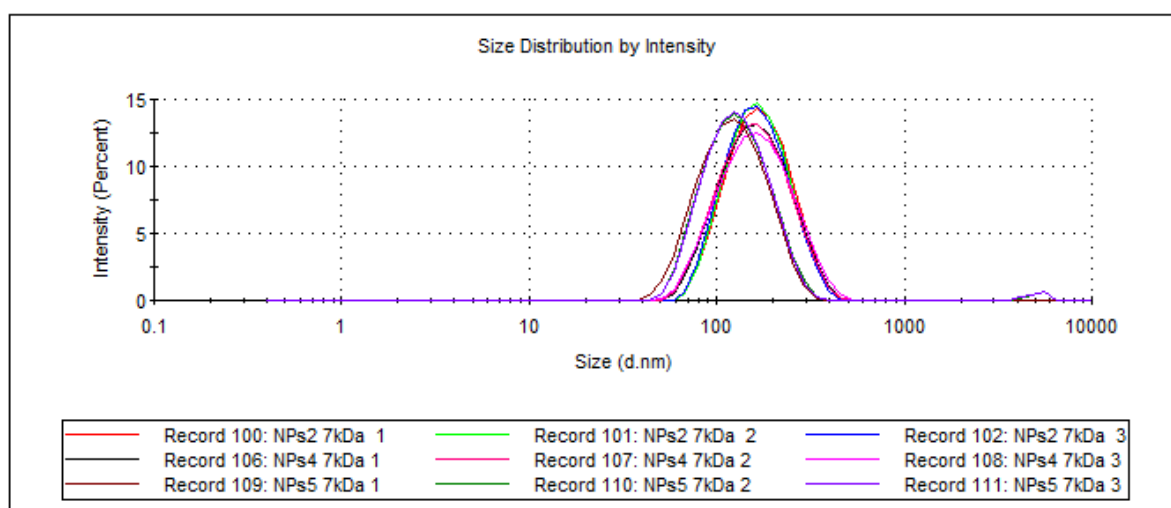

**Figure S1.** Reproducibility of the size distribution of NPs1 by preparation of three independent batches, each measured three times.

|                                | Size (d.nm):         | % Intensity: | St Dev (d.nm): |
|--------------------------------|----------------------|--------------|----------------|
| <b>Z-Average (d.nm): 118,8</b> | <b>Peak 1:</b> 144,7 | 100,0        | 64,36          |
| <b>Pdl: 0,177</b>              | <b>Peak 2:</b> 0,000 | 0,0          | 0,000          |
| <b>Intercept: 0,942</b>        | <b>Peak 3:</b> 0,000 | 0,0          | 0,000          |

**Result quality : Good**

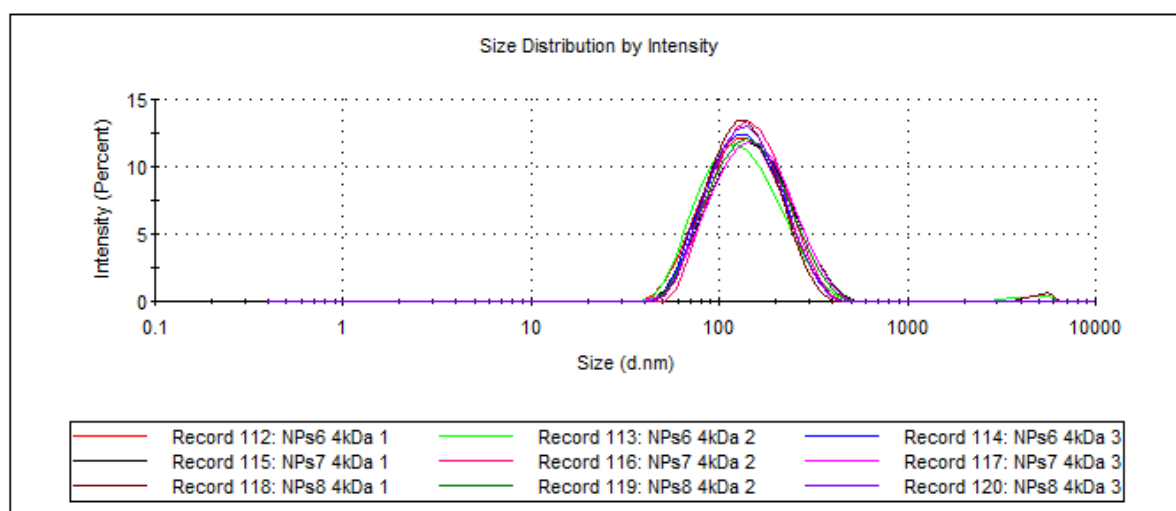

**Figure S2.** Reproducibility of the size distribution of NP2 by preparation of three independent batches, each measured three times.

|                                | Size (d.nm):         | % Intensity: | St Dev (d.nm): |
|--------------------------------|----------------------|--------------|----------------|
| <b>Z-Average (d.nm): 156,0</b> | <b>Peak 1:</b> 194,6 | 100,0        | 92,67          |
| <b>Pdl: 0,200</b>              | <b>Peak 2:</b> 0,000 | 0,0          | 0,000          |
| <b>Intercept: 0,937</b>        | <b>Peak 3:</b> 0,000 | 0,0          | 0,000          |

**Result quality : Good**

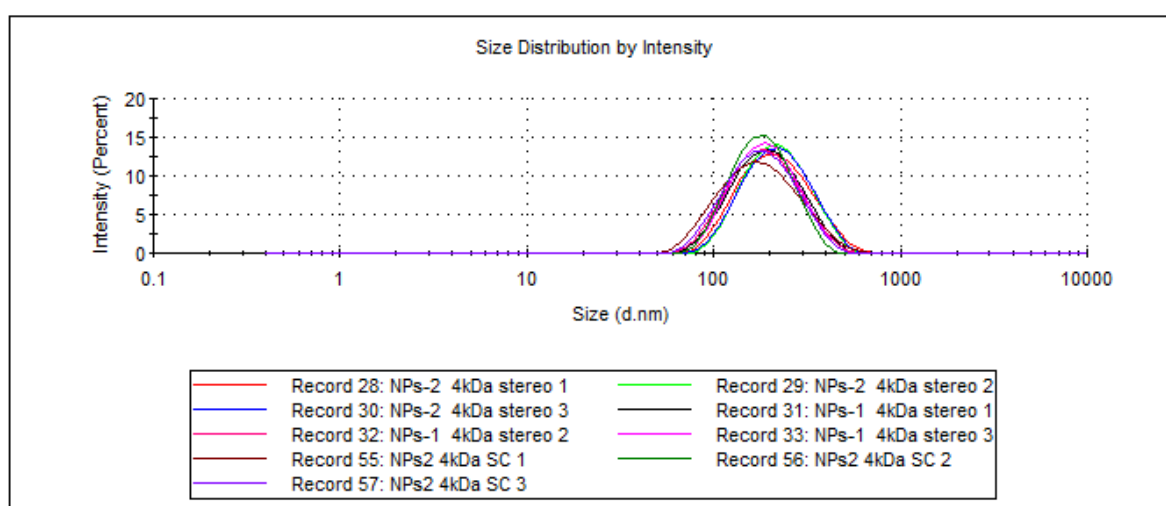

**Figure S3.** Reproducibility of the size distribution of NP3 by preparation of three independent batches, each measured three times.

|                                | Size (d.nm):         | % Intensity: | St Dev (d.nm): |
|--------------------------------|----------------------|--------------|----------------|
| <b>Z-Average (d.nm):</b> 178,8 | <b>Peak 1:</b> 201,1 | 98,8         | 75,57          |
| <b>Pdl:</b> 0,190              | <b>Peak 2:</b> 5120  | 1,2          | 530,2          |
| <b>Intercept:</b> 0,934        | <b>Peak 3:</b> 0,000 | 0,0          | 0,000          |

**Result quality : Good**

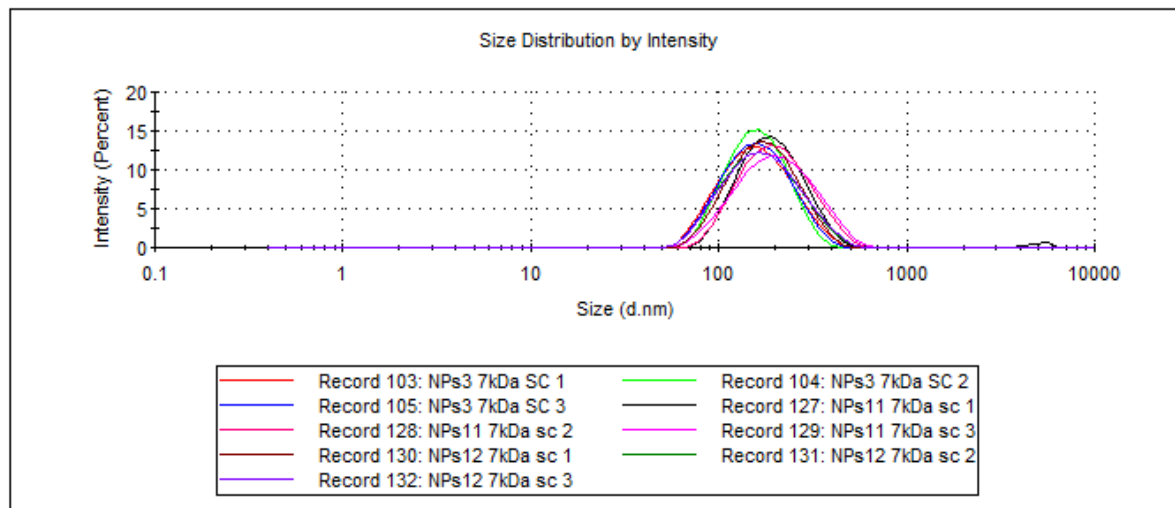

**Figure S4.** Reproducibility of the size distribution of NPs5 by preparation of three independent batches, each measured three times.
